# Supplementary material for: Fabrication of polypyrrole conductive matrix covered MnNi2O4 nanocomposite as a positive electrode material for asymmetric supercapacitor applications
Source: Royal Society of Chemistry journal article supplement (doi:10.1039/d3nj05296f), 2024-01-01
Supplement: d3nj05296f1.pdf [file d3nj05296f1.pdf]

## Fabrication of Polypyrrole Conductive Matrix covered $\text{MnNi}_2\text{O}_4$ Nanocomposite as the Positive Electrode Material in Asymmetric Supercapacitors

*Anandaraj Sathiyar<sup>a‡</sup>, Elaiyappillai Elanthamilan<sup>b‡</sup>, Sea-Fue Wang<sup>b,\*</sup>,  
Sivanantham Dhineshkumar<sup>a</sup>, Johnson Princy Merlin<sup>a\*</sup>*

<sup>a</sup> PG & Research Department of Chemistry, Bishop Heber College (Autonomous), Affiliated to Bharathidasan University, Tiruchirappalli-620017, Tamil Nadu, India.

<sup>b</sup> Department of Materials and Mineral Resources Engineering, National Taipei University of Technology, No. 1, Sec. 3, Chung-Hsiao East Rd., Taipei 106, Taiwan.

‡-contributed equally

---

### Correspondence

*Prof. Sea-Fue Wang*

*Email: sfwang@ntut.edu.tw*

*Dr. Johnson Princy Merlin*

*Email: pmej\_68@yahoo.co.in*

---

### 1. Materials used

Pyrrrole monomer, cetyltrimethyl ammonium bromide (CTAB) and potassium peroxodisulphate (PDS) were received from Merck.  $\text{Ni}(\text{NO}_3)_2 \cdot 6\text{H}_2\text{O}$ , Manganese acetate and ethanol ( $\text{C}_2\text{H}_5\text{OH}$ ) were purchased from SRL (India). Acetylene black, polyvinylidene fluoride (PVDF) and N-methyl-2-pyrrolidone (NMP) were received from Merck.

### 2. Synthesis of $\text{MnNi}_2\text{O}_4$

Manganese nickel oxide was synthesized via a simple co-precipitation method. First, 0.4 M of  $\text{Ni}(\text{NO}_3)_2 \cdot 6\text{H}_2\text{O}$  and 0.2 M of manganese acetate were dissolved separately in 50 ml of water. After that, 0.2 M of manganese acetate was added drop by drop to the 0.4 M  $\text{Ni}(\text{NO}_3)_2 \cdot 6\text{H}_2\text{O}$  solution at 60 °C for 15 min., then 0.5 M  $\text{NH}_4\text{OH}$  was added drop by drop for an hour under stirred conditions. The precipitate was filtered and washed several times with

water and ethanol, and dried at 80 °C for 12 h. Finally, the precipitate was calcined at 350 °C for 3 h. to get a dark-brown colored  $\text{MnNi}_2\text{O}_4$ .

### **3. Synthesis of Polypyrrole (PPY)**

25 ml of 0.5 M  $\text{H}_2\text{SO}_4$ , 200 ml of double distilled water, and 0.01 g of CTAB were taken in a beaker and stirred for 1 h in a magnetic stirrer. Then, the beaker was kept in an ice bath, and 5 ml of pyrrole was added, and stirring was continued. To this mixture, 20 ml of 0.8 M of  $\text{K}_2\text{S}_2\text{O}_8$  was added dropwise till black coloration developed. Then, the reaction mixture was kept in a stirrer for 6 h. under cold conditions. Further, the product was neutralized with water and filtered. The dried precipitate was powdered and used for further analysis.

### **4. Materials characterization**

The phase configuration and surface functionalities of the as-prepared samples were performed using Bruker (XRD, Rigaku D/maxB, DMX-2200) and Jasco FT-IR-4600 spectroscopy, respectively. The microscopic analysis of the as-prepared samples was done by using Hitachi S-2400 scanning electron microscope equipped with an energy dispersive spectrometer (EDS), and the surface chemistry of the  $\text{MnNi}_2\text{O}_4/\text{PPY}$  composite was performed using ESCA/Auger Laboratory X-ray photoelectron spectroscopy. Supercapacitor measurements were performed using the Autolab (AUT51770) workstation.

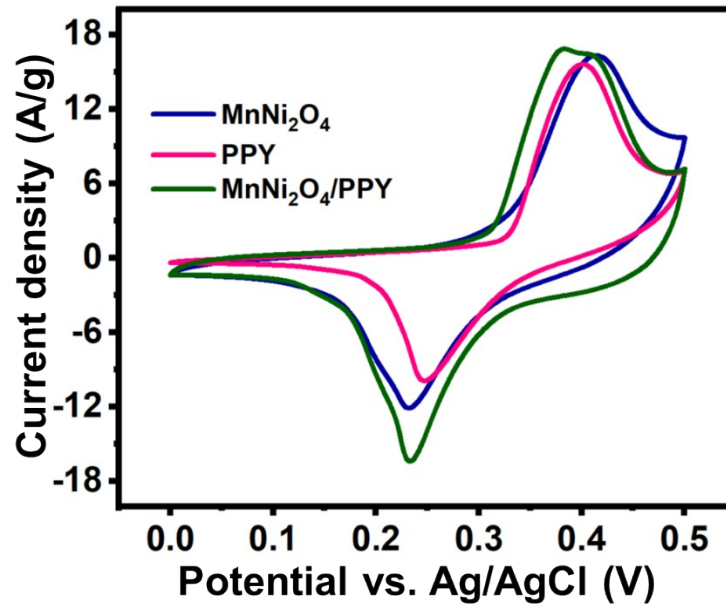

Fig. S1: CV curves of  $\text{MnNi}_2\text{O}_4$ , PPY and  $\text{MnNi}_2\text{O}_4/\text{PPY}$  composite at a scan rate of 5 mV/s in 1 M KOH.

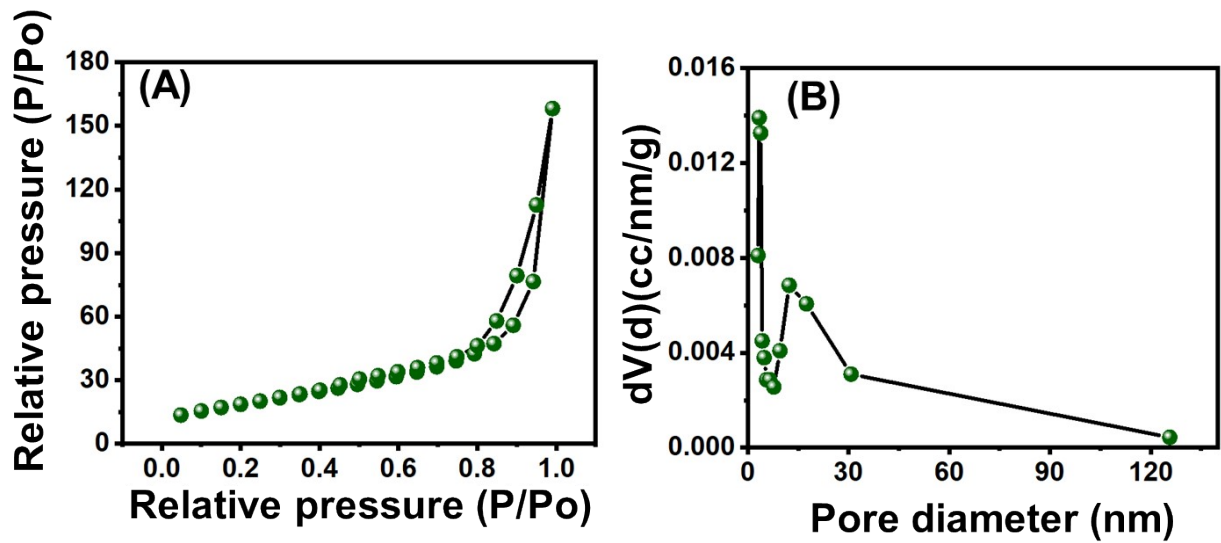

Fig. S2: (A)  $\text{N}_2$  adsorption-desorption isotherm curve and (B) corresponding pore size distribution curve of  $\text{MnNi}_2\text{O}_4/\text{PPY}$  composite.

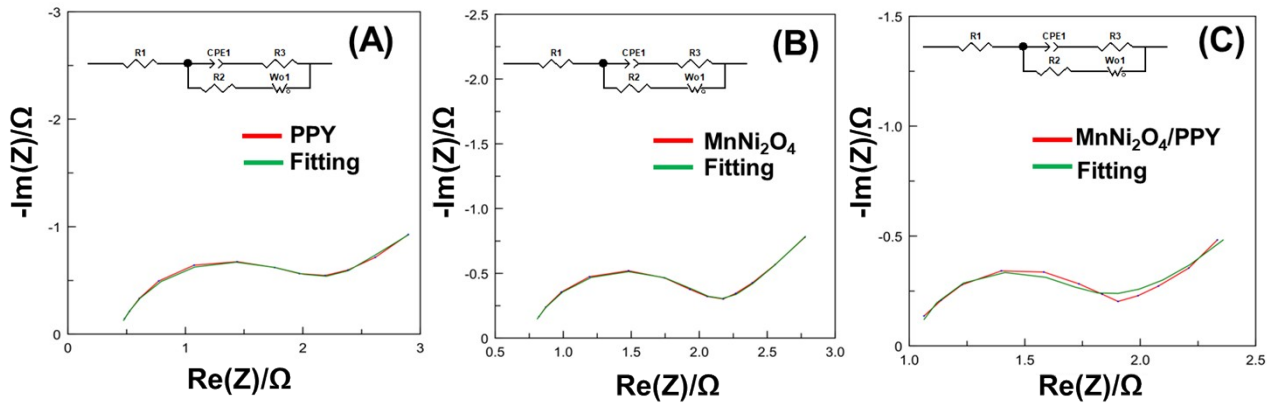

**Fig. S3: Nyquist plot of (A)  $MnNi_2O_4$ , (B) PPY and (C)  $MnNi_2O_4/PPY$  composite with fittings.**
